# Supplementary material for: Association of Existence of Sarcopenia and Poor Recovery of Swallowing Function in Post-Stroke Patients with Severe Deglutition Disorder: A Multicenter Cohort Study
Source: MDPI journal article supplement (doi:10.3390/nu14194115), 2022-10-03
Supplement: s1 [file s1]

**Table S1.** Logistic regression analysis for FILS gain ( $\geq 2$  points) including interaction between daily rehabilitation dose and sarcopenia

|                                                  | AOR  | 95% CI |       | P value |
|--------------------------------------------------|------|--------|-------|---------|
|                                                  |      | Lower  | Upper |         |
| Age                                              | 0.96 | 0.91   | 1.01  | 0.13    |
| Female sex                                       | 1.06 | 0.49   | 2.30  | 0.89    |
| CCI, updated                                     | 0.70 | 0.52   | 0.95  | 0.023   |
| FIM total score                                  | 1.01 | 0.99   | 1.02  | 0.35    |
| FILS score                                       | 0.66 | 0.54   | 0.81  | <0.001  |
| Phase angle                                      | 1.22 | 0.73   | 2.06  | 0.45    |
| Daily rehabilitation dose ( $\geq 162$ min/day)* | 1.11 | 0.23   | 5.29  | 0.90    |
| Sarcopenia                                       | 0.25 | 0.07   | 0.91  | 0.035   |
| Rehabilitation dose $\times$ sarcopenia          | 1.86 | 0.34   | 10.2  | 0.47    |

AOR, adjusted odds ratio; CCI, Charlson comorbidity index; FILS, Food Intake

LEVEL Scale; FIM, Functional Independence Measure; OR, odds ratio. \*Defined by median value in entire sample

**Table S2.** Logistic regression analysis for FILS gain ( $\geq 2$  points) including interaction between energy intake and sarcopenia

|                                      | AOR  | 95% CI |       | P value |
|--------------------------------------|------|--------|-------|---------|
|                                      |      | Lower  | Upper |         |
| Age                                  | 0.96 | 0.92   | 1.01  | 0.16    |
| Female sex                           | 0.92 | 0.43   | 1.95  | 0.82    |
| CCI, updated                         | 0.66 | 0.49   | 0.89  | 0.006   |
| FIM total score                      | 1.01 | 0.99   | 1.02  | 0.47    |
| FILS score                           | 0.68 | 0.56   | 0.82  | <0.001  |
| Phase angle                          | 1.20 | 0.71   | 2.02  | 0.50    |
| Energy intake ( $\geq 26$ kcal/day)* | 1.42 | 0.31   | 6.59  | 0.65    |
| Sarcopenia                           | 0.45 | 0.13   | 1.58  | 0.21    |
| Energy intake $\times$ sarcopenia    | 0.54 | 0.10   | 2.98  | 0.48    |

AOR, adjusted odds ratio; CCI, Charlson comorbidity index; FILS, Food Intake LEVEL Scale; FIM, Functional Independence Measure; OR, odds ratio. \*Defined by median value in entire sample
